# Supplementary material
Source: PubMed Central journal article supplement (PMC8656912)
Supplement: jcsm.9308.ds001.pdf [file jcsm.9308.ds001.pdf]

**Figure S1.** Change in Pichot fatigue scale score during 5 years of mandibular advancement device therapy ( $p < 0.0001$  for comparison with baseline at each follow-up visit). FU, follow-up.

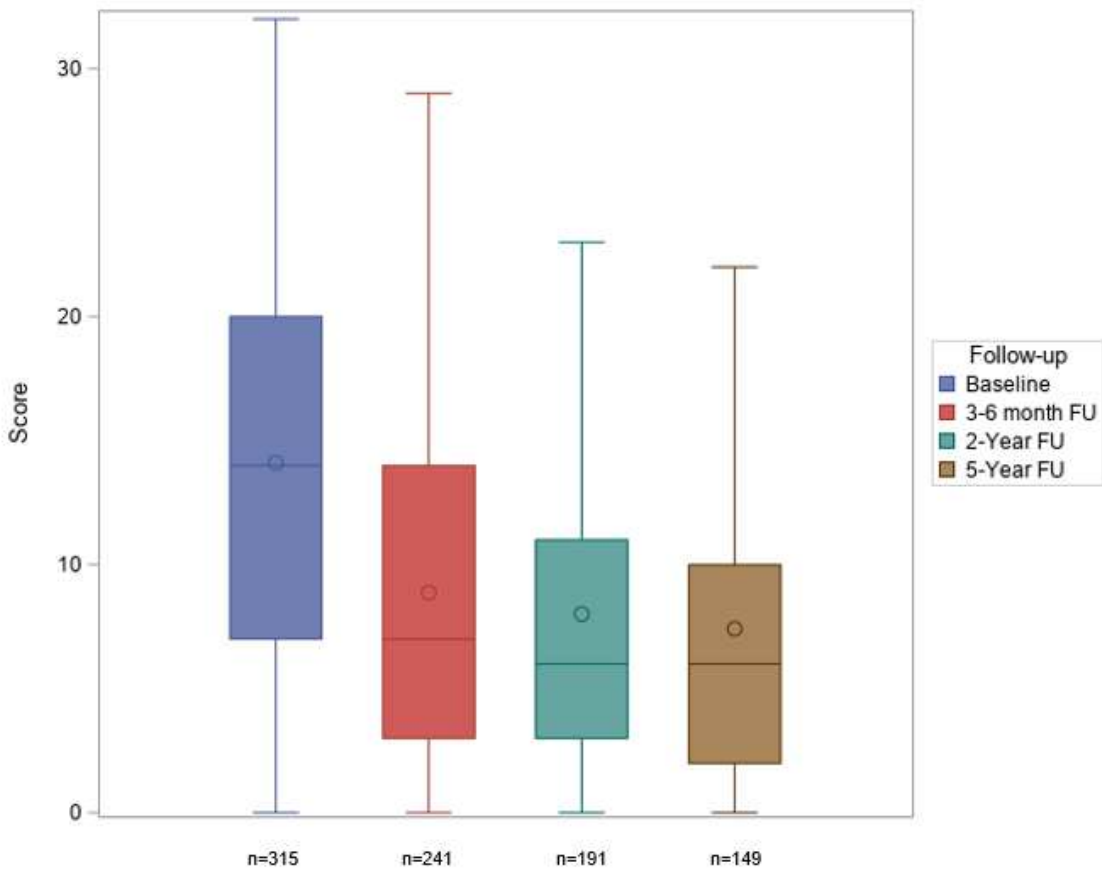

**Figure S2.** Visual analogue scale (VAS) scores for sleep quality, state on waking and morning headache during 5 years of mandibular advancement device therapy.

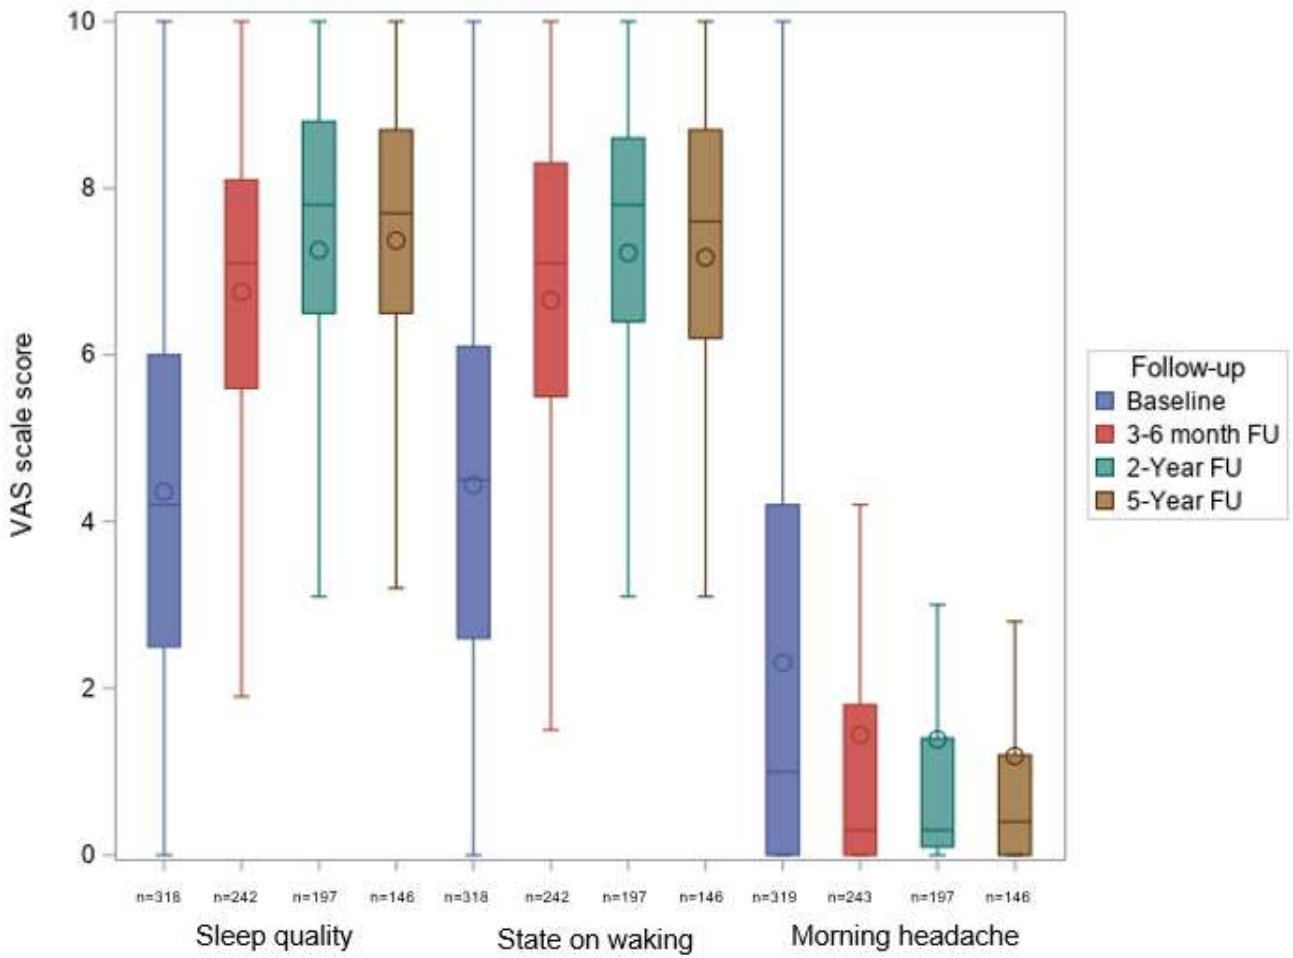

## **ORCADES Investigators**

- Dr Darius ABEDIPOUR: Cabinet médical, Lyon, France.
- Dr Aurélie ALLARD-REDON: Cabinet dentaire, BEHREN LES FORBACH, France.
- Dr Alexandre ARANDA: Clinique de l'Union, Service de Neurologie, Saint Jean, France.
- Dr Valérie ATTALI: Hôpital Pitié Salpêtrière Service du Sommeil, PARIS, France.
- Dr Frédérique BAVOZET: CH de Valence, Service ORL, VALENCE, France.
- Dr Martine BECU: CHG de Chalons en Champagne, Service de Pneumologie, Chalons en Champagne, France.
- Dr Wally BERUBEN: Cabinet Dentaire, Chalons en Champagne, France.
- Dr Jérôme BESSARD: Clinique de l'Union, Service d'Odontologie, Saint Jean, France.
- Dr Isabelle BONAFE: Faculte d'odontologie, Montpellier, France.
- Dr Mohammed BOUKHANA: Centre du sommeil, Metz, France.
- Dr Bruno CHABROL: Cabinet Dentaire, CREIL, France.
- Dr Gérard CHATTE: Cabinet médical, CALUIRE, France.
- Dr Dominique CHAUVEL-LEBRET: CHU Rennes, Pole d'Odontologie et Chirurgie Buccale, Rennes, France.
- Dr Jean-Marc COLLET: Hôpital Pitie Salpetrière Service de Stomatologie et Chirurgie Maxillo-Faciale, PARIS, France.
- Dr Olivier COSTE: Polyclinique du Tondu, Bordeaux, France.
- Dr Nathalie DUMONT: Cabinet médical, Marseille, France.
- Dr Sophie DURAND-AMAT: Cabinet médical, Lagny sur Marne, France.
- Pr Marie-Pia D'ORTHO: Groupe Hospitalier Bichat Service de Physiologie-Explorations fonctionnelles, PARIS, France.
- Dr Jean-Marc ELBAUM: Cabinet Médical, Marseille, France.
- Dr Olivier GALLET DE SANTERRE: Clinique Beau Soleil, MONTPELLIER, France.
- Dr Frédéric GOUTORBES: Centre Hospitalier de Béziers, Service de Pneumologie, BEZIERS, France.
- Dr Thierry GRANDJEAN: Cabinet dentaire, Schoeneck, France.
- Dr Wilma GUYOT: Cabinet Dentaire, VANDOEUVRE LES NANCY, France.
- Dr Doniphane HAMMER: Espace Medical Rabelais, POITIERS, France.
- Dr Carmen HAVASI: Cabinet Dentaire, Nice, France.
- Dr Pascal HUET: Clinique Breteche, Nantes, France.
- Dr Jean-Baptiste KERBRAT: CHRU de ROUEN-Hopital Charles Nicolle, Service de Maxillo-Faciale, Rouen, France.
- Dr Hauria KHEMLICHE: Centre Hospitalier de Senlis Avenue Paul Rouge Unite Sommeil, Senlis, France.
- Dr Christian KOLTES: Centre du sommeil, Metz, France.
- Pr Damien LEGER: H<sup>^</sup>otel Dieu de PARIS Centre de Sommeil, PARIS, France.
- Dr Laurent LACASSAGNE: Clinique de l'Union, Service de Pneumologie, Saint Jean, France.
- Dr Xavier LAUR: Cabinet Dentaire, CASTRES, France.
- Dr Lionel LEROUSSÉAU: Centre Hospitalier d'Antibes, Service de Pneumologie, Antibes, France.
- Dr Olivier LIARD: Cabinet Dentaire, Albi, France.
- Dr Christophe LOISEL: Cabinet dentaire Lagny sur Marne, France.
- Dr Matthieu LONGUET: Centre Hospitalier de Béziers, Service ORL, BEZIERS, France.

Dr Anne MALLART: H<sup>^</sup>opital Roger Salengro Service de Neurologie Clinique, Lille, France.  
Dr Francis MARTIN: Centre Hospitalier de Compiègne Service de Pneumologie, Unité des pathologies du Sommeil, Compiègne, France.  
Dr Frederic MERLE-BERAL: Clinique de l'Union, Service d'Odontologie, Saint Jean, France.  
Pr Jean-Claude MEURICE: CHU de Poitiers, Service de Pneumologie, Poitiers, France.  
Dr Zoubida MOKHTARI: Centre Hospitalier de Senlis Avenue Paul Rouge Unite Sommeil, Senlis, France.  
Dr Christelle MONACA: Hôpital Roger Salengro Service de Neurologie Clinique, Lille, France.  
Dr Pierre-Jean MONTEYROL: Polyclinique du Tondu, Bordeaux, France.  
Pr Jean-François MUIR: CHU de ROUEN- Hôpital de Bois Guillaume Service de Pneumologie, ROUEN, France.  
Dr Eric MULLENS: FONDATION BON SAUVEUR, Laboratoire de Sommeil, ALBI, France.  
Dr Dominique MULLER: Cabinet medical, Metz, France.  
Dr Charles PAOLI: CH Montreuil, MONTREUIL, France.  
Dr François-Xavier PETIT: Maison de la Mutualité, Nantes, France.  
Dr Bernard PIGEARIAS: Cabinet de Pneumologie, Laboratoire du Sommeil et de l'Effort, NICE, France.  
Dr Marc PRADINES: Cabinet Dentaire, TOULOUSE, France.  
Dr Arnauld PRIGENT: Clinique St Laurent, Service de Pneumologie, Rennes, France.  
Dr Gil PUTTERMAN: Hôtel Dieu de PARIS, Service de Stomatologie PARIS, France.  
Dr Marc REY: CHU Timone, Centre du Sommeil de Neurophysiologie, Marseille, France.  
Dr Mickael SAMAMA: Hôpital Pitie Salpetrière Service de Stomatologie et Chirurgie Maxillo-Faciale, PARIS, France.  
Pr Renaud TAMISIER: CHU de Grenoble, Physiologie, sommeil et exercice, Grenoble, France.  
Dr Michel TIBERGE: CHU de RANGUEIL, Service de Neurologie et Explorations Fonctionnelles Neurologiques, Toulouse, France.  
Dr Cyrille TISON: Hôpital Roger Salengro, Service de Stomatologie, Lille, France.  
Dr Fabienne TORDJMAN: Hôpital Pitie Salpetrière Service du Sommeil, PARIS, France.  
Dr Bernard TRIOLET: Cabinet Dentaire Ribecourt Dreslincourt, France.  
Pr Christian VACHER: Hôpital Beaujon Service de Chirurgie Maxillo-Faciale et Stomatologie, Clichy, France.  
Dr Marie-Françoise VECCHIERINI: Hôtel Dieu Centre de Sommeil, PARIS, France.  
Dr Alain VERAÏN: CHU de Grenoble, service odontologie, Grenoble, France.
